# Supplementary material for: Hydroxyl–yne click polymerization: a facile strategy toward poly(vinyl amino ether ester)s with color-tunable luminescence
Source: Royal Society of Chemistry journal article supplement (doi:10.1039/d2py01581a), 2023-01-01
Supplement: d2py01581a1.pdf [file d2py01581a1.pdf]

## Supporting Information

### Hydroxyl-Yne Click Polymerization: A Facile Strategy toward Poly(vinyl amino ether ester)s with Color-Tunable Luminescence

Qimin Jiang<sup>\*a</sup>, Hongyan Zhang<sup>a</sup>, Qilin Jiang<sup>b</sup>, Shuyi Zhang<sup>a</sup>, Shuyi Guan<sup>a</sup>, Wenyan Huang<sup>a</sup>, Xiaoqiang Xue<sup>a</sup>, Hongjun Yang<sup>a</sup>, Li Jiang<sup>a</sup>, Bibiao Jiang<sup>\*a,c</sup>, and Sridhar Komarneni<sup>\*d</sup>

<sup>a</sup> Jiangsu Key Laboratory of Environmentally Friendly Polymeric Materials, School of Materials Science and Engineering, Jiangsu Collaborative Innovation Center of Photovoltaic Science and Engineering, Changzhou University, Changzhou, Jiangsu 213164, People's Republic of China.

<sup>b</sup> School of Chemistry, University of Edinburgh, Joseph Black Building, David Brewster Road, Edinburgh, UK EH9 3FJ.

<sup>c</sup> Changzhou University Huaide College, Jingjiang 214500, People's Republic of China.

<sup>d</sup> Materials Research Institute and Department of Ecosystem Science and Management, 204 EEL, The Pennsylvania State University, University Park, Pennsylvania 16802, United States

## Supplementary Figures and Tables

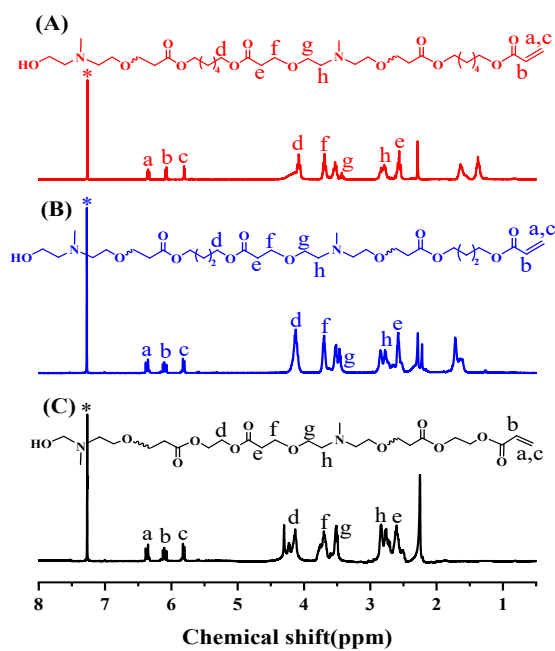

**Fig. S1**  $^1\text{H}$  NMR spectra of (A) PAEE1, (B) PAEE2, and (C) PAEE3. The solvent peaks are marked with asterisks.

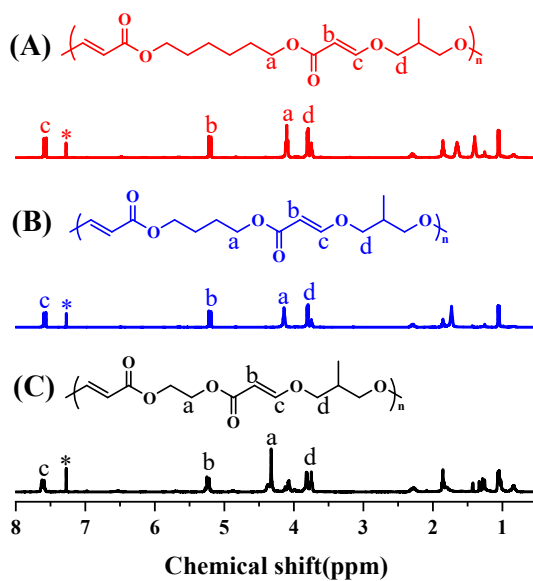

**Fig. S2**  $^1\text{H}$  NMR spectra of (A) PVEE1, (B) PVEE2, and (C) PVEE3. The solvent peaks are marked with asterisks.

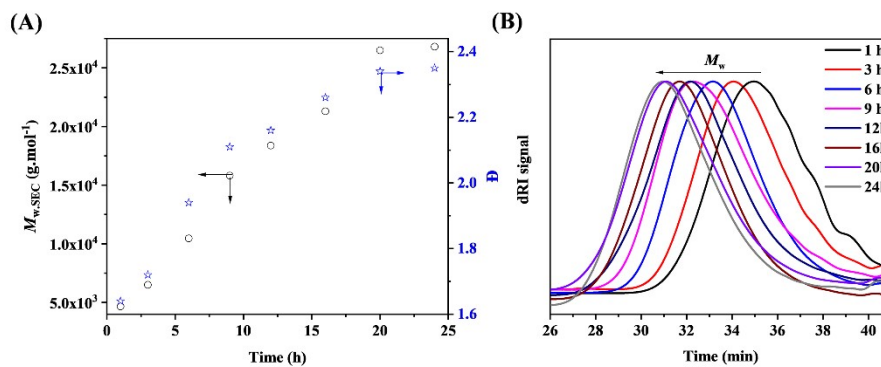

**Fig. S3** (A)  $M_{w,SEC}$  and PDI and (B) dRI-SEC curves of polymers at different polymerization times for catalyst-free and solvent-free hydroxyl-yne click polymerization of *N*-methyldiethanolamine and 1,6-hexanediol dipropiolate.

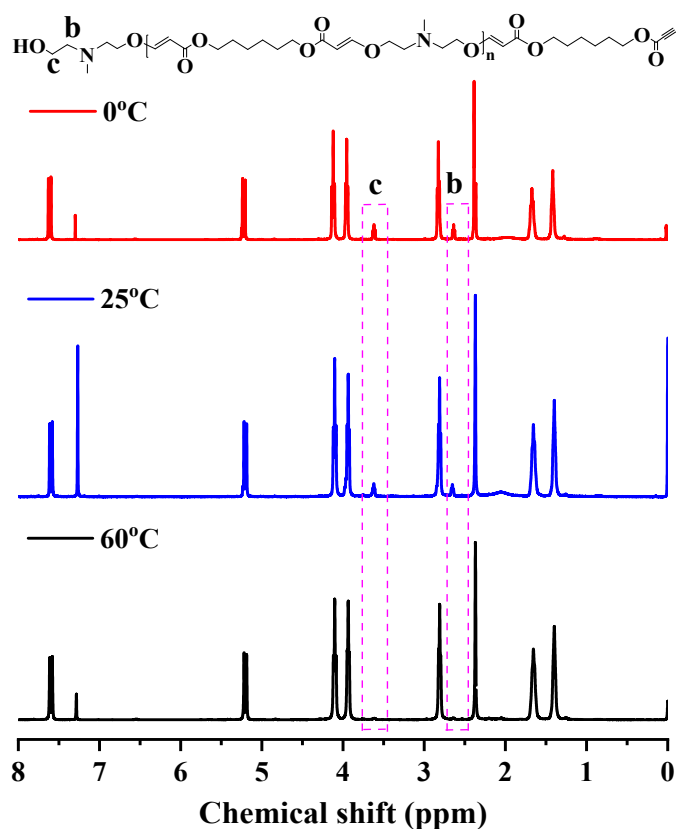

**Fig. S4**  $^1\text{H}$  NMR spectra of obtained poly(vinyl amino ether ester) (PVAEE1) prepared by at different temperature in  $\text{CDCl}_3$ . The solvent peaks are marked with asterisks.

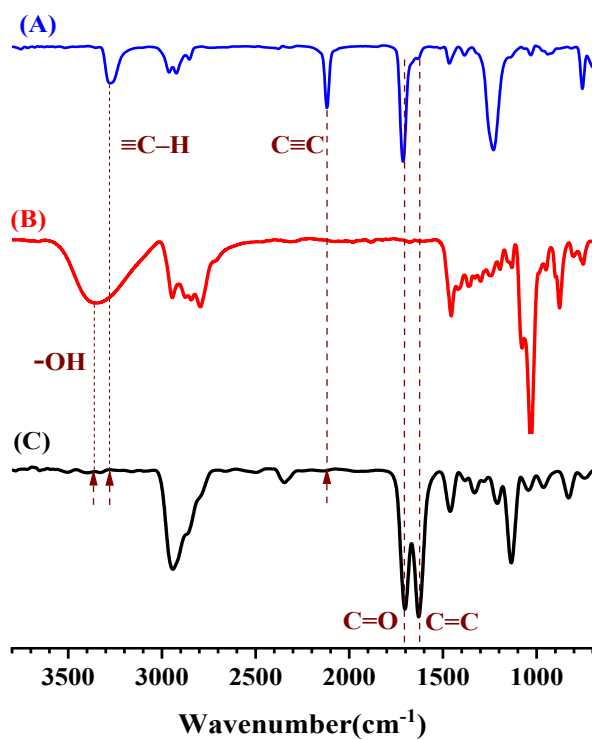

Fig. S5 FT-IR spectra of (A) BDDP, (B) MDEA, and (C) PVAEE2.

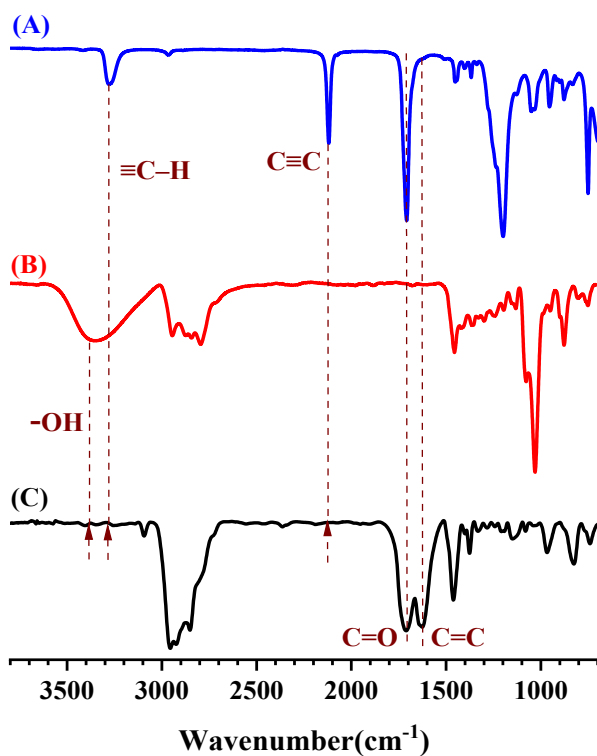

Fig. S6 FT-IR spectra of (A) EDDP, (B) MDEA, and (C) PVAEE3.

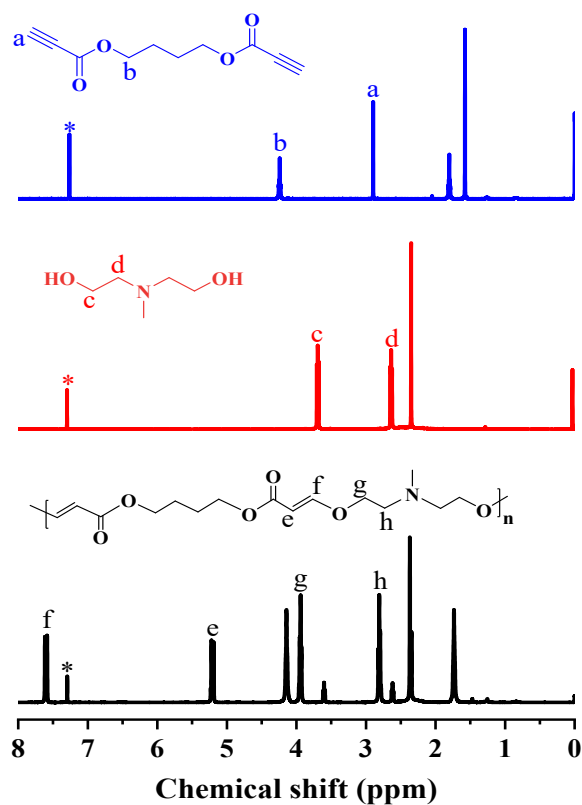

**Fig. S7**  $^1\text{H}$  NMR spectra of (A) BDDP, (B) MDEA, and (C) PVAEE2 in  $\text{CDCl}_3$ . The solvent peaks are marked with asterisks.

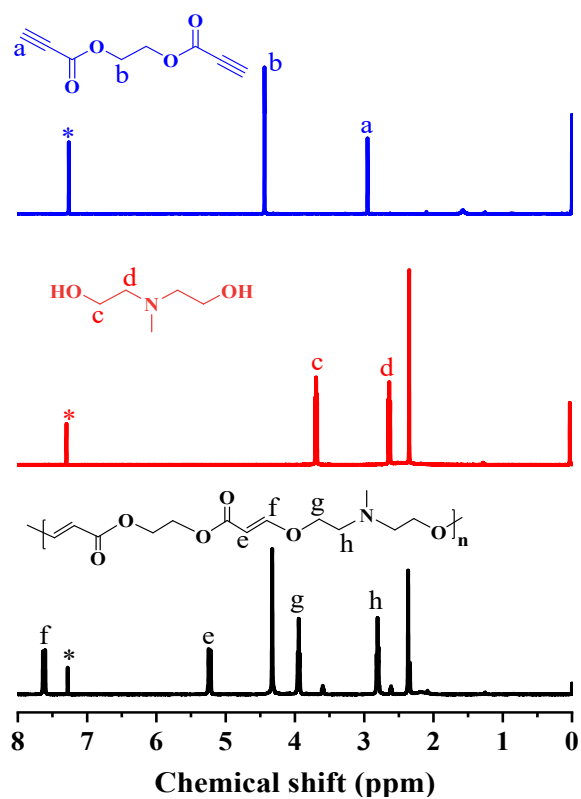

**Fig. S8**  $^1\text{H}$  NMR spectra of (A) EDDP, (B) MDEA, and (C) PVAEE3 in  $\text{CDCl}_3$ . The solvent peaks are marked with asterisks.

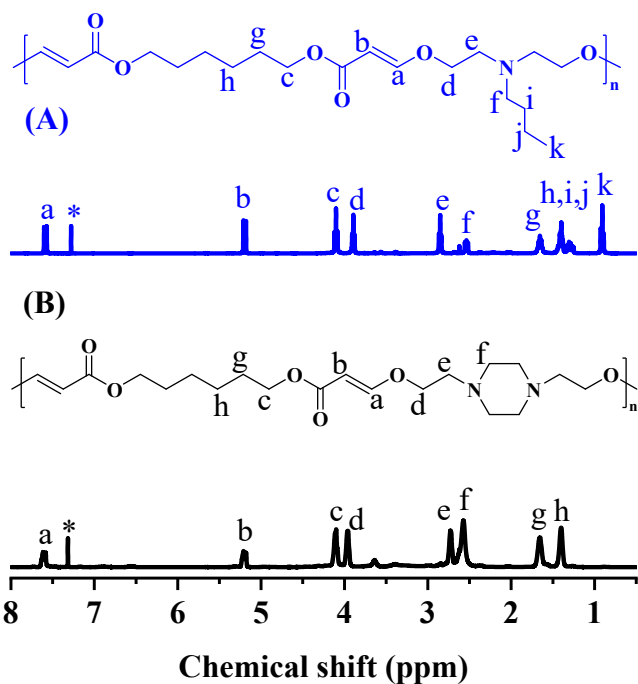

**Fig. S9**  $^1\text{H}$  NMR spectra of PVAAEs prepared from (A) *N*-butyldiethanolamine (BDEA) with HDDP, and (B) 1,4-*bis*-(2-hydroxyethyl)piperazine (BHEP) with HDDP. The solvent peaks are marked with asterisks.

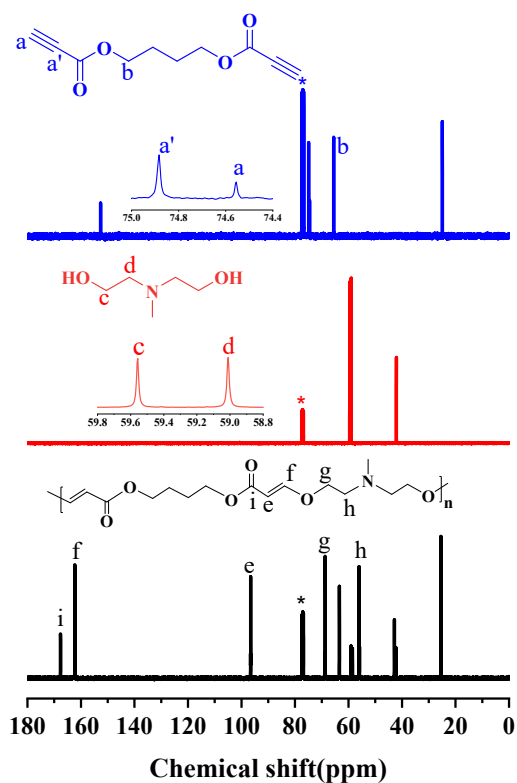

**Fig. S10.**  $^{13}\text{C}$  NMR spectra of (A) BDDP, (B) MDEA, and (C) PVAAE2 in  $\text{CDCl}_3$ . The solvent peaks are marked with asterisks.

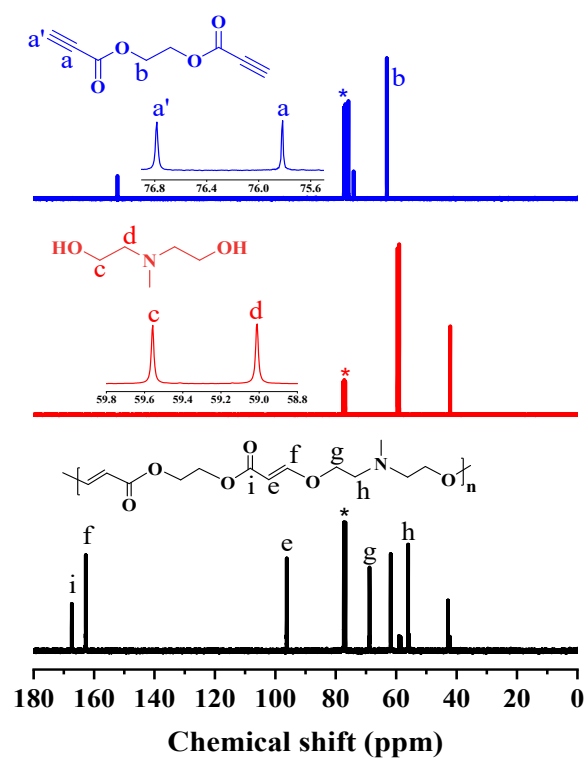

**Fig. S11**  $^{13}\text{C}$  NMR spectra of EDDP, (B) MDEA, and (C) PVAEE3 in  $\text{CDCl}_3$ . The solvent peaks are marked with asterisks.

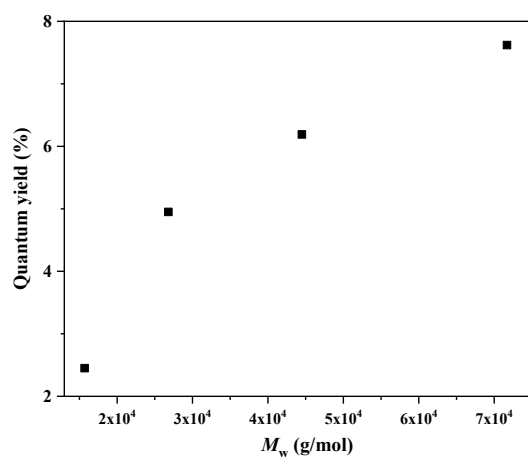

**Fig. S12** The effect of the molecular weight of PVAEE1 on the quantum yield.

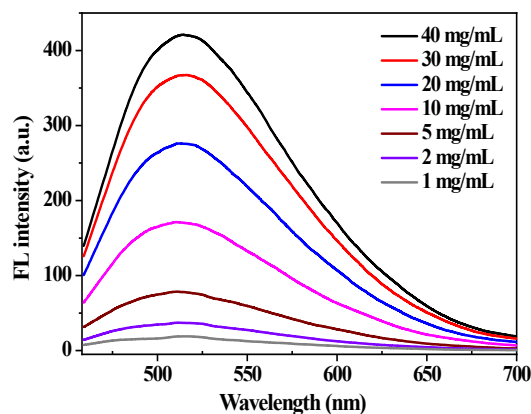

**Fig. S13** FL spectra of (A) PVAEE2 in THF solutions at different concentrations with  $\lambda_{\text{ex}} = 440$  nm.

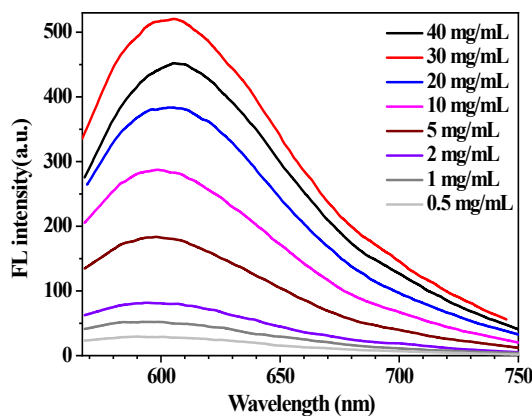

**Fig. S14** FL spectra of (A) PVAEE3 in THF solutions at different concentrations with  $\lambda_{\text{ex}} = 560$  nm.

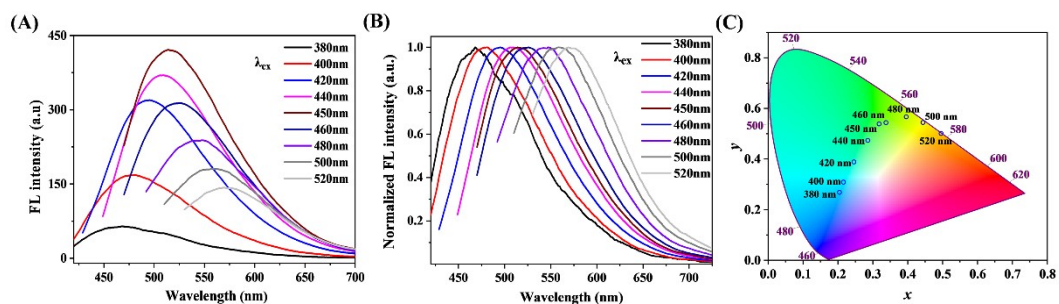

**Fig. S15** (A) Emission spectra, (B) normalized emission spectra and (C) CIE coordinates of PVAEE2 at various excitation wavelengths. Concentration of 40 mg/mL.



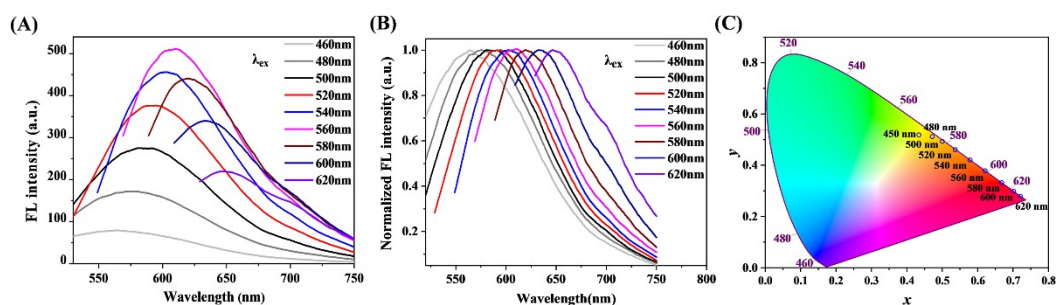

**Fig. S16** (A) Emission spectra, (B) normalized emission spectra and (C) CIE coordinates of PVAEE3 at various excitation wavelengths. Concentration of 40 mg/mL.

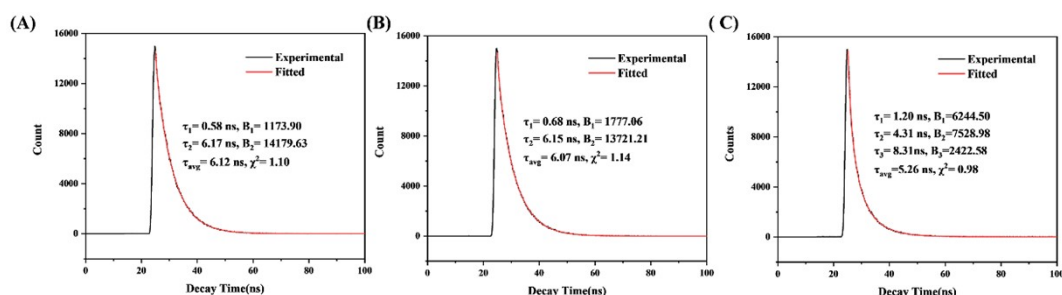

**Fig. S17** Fluorescence decay curves of (A) PVAEE1, (B) PVAEE2, and (C) PVAEE3 in THF solution with the polymer concentration of 40 mg/mL.

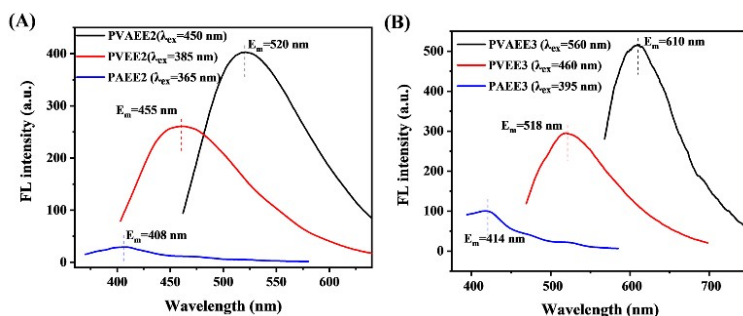

**Fig. S18** FL spectra of (A) PVAEE2, PVEE2, and PAEE2; and (B) PVAEE3, PVEE3, and PAEE3 in THF solution with the concentration of 40 mg/mL excited at their optimal excitation wavelength ( $\lambda_{ex}$ ).

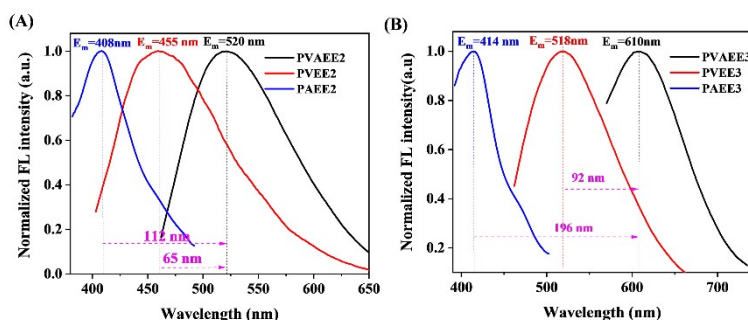

**Fig. S19** Normalized maximum emission spectra of (A) PVAEE2, PVEE2, and PAEE2; and (B) PVAEE3, PVEE3, and PAEE3 in THF solution with the concentration of 40 mg/mL.

**Table S1.** The results of PVAEEs prepared by hydroxyl–yne click polymerization.<sup>a</sup>

| Entry      | Temp.<br>(°C) | $M_{w\cdot SEC}$<br>/g/mol | $\bar{D}$ | $\lambda_{ex}$<br>/nm <sup>b</sup> | $\lambda_{em}$<br>/nm <sup>b</sup> | $\Phi(\%)^c$ |
|------------|---------------|----------------------------|-----------|------------------------------------|------------------------------------|--------------|
| PVAEE<br>1 | 25            | 26800                      | 2.35      | 380                                | 456                                | 4.8          |
| PVAEE<br>2 | 25            | 22600                      | 2.92      | 450                                | 520                                | 6.2          |
| PVAEE<br>3 | 60            | 18600                      | 1.99      | 560                                | 610                                | 11.8         |

<sup>a</sup> Conducted in air for 24 h;  $[M]_{diols}=[M]_{diynes}$ ;

<sup>b</sup> Maximum excitation and emission wavelength measured by fluorescence spectrometer, PVAEEs in THF solution with the polymer concentration of 40 mg/mL;

<sup>c</sup> Quantum yield measured by excited at their optimal wavelength.
